# Supplementary material for: Molecular Response of Ulva prolifera to Short-Term High Light Stress Revealed by a Multi-Omics Approach
Source: MDPI journal article supplement (doi:10.3390/biology11111563), 2022-10-25

**Supporting material for**

**Molecular response of *Ulva prolifera* to short-term  
high light stress revealed by a multi-omics approach**

Kai Gu<sup>1+</sup> Yuling Liu<sup>1+</sup>, Ting Jiang<sup>1</sup>, Chuner Cai<sup>1,2,3\*</sup>, Hui Zhao<sup>1</sup>, Xuanhong Liu<sup>1</sup>, Peimin He<sup>1,2,3</sup>

*1 College of Marine Ecology and Environment, Shanghai Ocean University, Shanghai, China*

*2 National Demonstration Center for Experimental Fisheries Science Education (Shanghai Ocean University), Shanghai, China*

*3 Co-Innovation Center of Jiangsu Marine Bio-industry Technology, Lianyungang 222005, China*

\*Corresponding Author: Dr. Chuner Cai, College of Marine Ecology and Environment, Shanghai Ocean University, Shanghai, China-201306, E-mail: cecai@shou.edu.cn.

<sup>+</sup>These authors contributed equally to this work.

## **Content**

### **Tables**

**Table S1.** Primers design of ten different genes

**Table S2.** QC data statistics of transcriptome

**Table S3.** Statistics of transcriptome assembly results

**Table S4.** Statistics of lipid molecules with significant differences

**Figure S1.** Gene annotation Venn diagram in transcriptome

**Figure S2.** Statistical table of the number of unique peptide segments in the proteome

**Figure S3.** Statistics of proteome data

**Figure S4.** Statistical of lipid subclasses and numbers

**Table S1. Primers design of ten different genes**

| Gene                 | Forward primer (5'-3')    | Reverse primer (5'-3') | Length(bp) |
|----------------------|---------------------------|------------------------|------------|
| 18s rDNA             | TGCCTAGTAAGCGCGAGTCA      | AAACGATGGGCAGGGAAAC    | 119        |
| TRINITY_DN5118_c0_g1 | CTGACAACCTACCCATCCCC      | CGTTTGTGGGCTTGCTGATG   | 101        |
| TRINITY_DN5090_c1_g6 | GCAGAACAACCGCACTGT        | CCGACGTCTCCGAAATAGATG  | 120        |
| TRINITY_DN5143_c0_g2 | ACACCTTTCTTTACTTTAAACTGGT | AGCTAAATGATGGTGTGCTGT  | 120        |
| TRINITY_DN3918_c0_g1 | TGTGCGACAGGTGCAACAT       | GGGAGCACATCAGGCTATTGA  | 120        |
| TRINITY_DN6178_c1_g6 | G TTCACCACGATCTTCCGCT     | CCACTGTTTCAAGGGCATCG   | 109        |
| TRINITY_DN6515_c0_g5 | CTCCTTCAGCGCCTCATACT      | CGTTCCACGCGTTTGCTC     | 77         |
| TRINITY_DN4211_c0_g1 | TCGGCGTTCAACAACATC        | TTCTCCTCCTGCTTCAGAG    | 570        |
| TRINITY_DN4291_c0_g1 | CAGAGAAGCTATCAACGCCA      | CGAAGCTGGTCGAGTTCAAAAA | 78         |
| TRINITY_DN4172_c0_g2 | GTATCCAGAGTTCCCGACCA      | GCGCGACATACAATGACTTGG  | 104        |

**Table S2. QC data statistics of transcriptome**

|                         | A1         | A2         | A3         | C1         | C2         | C3         |
|-------------------------|------------|------------|------------|------------|------------|------------|
| Total Reads Count(#)    | 41327280   | 50009912   | 41377612   | 42682868   | 39023236   | 40460552   |
| Total Bases Count(bp)   | 5921667415 | 7183791842 | 5926713744 | 6133118947 | 5579132287 | 5831055701 |
| Average Read Length(bp) | 143.29     | 143.65     | 143.23     | 143.69     | 142.97     | 144.12     |
| Q30 Bases Count(bp)     | 5710561628 | 6930427868 | 5718061370 | 5909513053 | 5382059322 | 5614990342 |
| Q30 Bases Ratio(%)      | 96.44%     | 96.47%     | 96.48%     | 96.35%     | 96.47%     | 96.29%     |
| GC Bases Count(bp)      | 3529771433 | 4279597016 | 3545467511 | 3653070737 | 3351054782 | 3511594826 |
| GC Bases Ratio(%)       | 59.61%     | 59.57%     | 59.82%     | 59.56%     | 60.06%     | 60.22%     |

**Note:**

Total Reads Count: the number of all reads in the sample

Total Base Count: the number of bases, i.e. the amount of data

Average Read Length: mean sequence length

Q30 Base Count: the number of bases whose quality is above 30

Q30 Base Ratio: the percentage of bases whose quality is above 30

GC Base Count: the number of GC base

GC Base Ratio: The percentage of GC base

**Table S3. Statistics of transcriptome assembly results**

|            | No.    | ≥500bp | ≥1000bp | N50  | N90  | Maximum length | Minimum length | Total length | Average length |
|------------|--------|--------|---------|------|------|----------------|----------------|--------------|----------------|
| Transcript | 108031 | 86318  | 75243   | 5355 | 1804 | 26903          | 201            | 339698065    | 3144.45        |
| Unigene    | 28362  | 13216  | 9470    | 3512 | 445  | 26903          | 201            | 39882047     | 1406.18        |

**Note:**

Transcript: spliced transcript sequence.

Unigene: unredundant spliced transcript sequence

N50/N90 is defined as the sequence of spliced transcripts from largest to smallest by length, with the length of the accumulated transcripts to the length of the spliced transcripts not less than 50%/90% of the total length.

**Table S4. Statistics of lipid molecules with significant differences**

| Lipid Ion              | Class | VIP  | <i>p</i> -value | FC   | RT-(min) |
|------------------------|-------|------|-----------------|------|----------|
| DGDG(16:4/18:4)+HCOO   | DGDG  | 1.26 | 0.008           | 3.01 | 6.56     |
| MGDG(16:0/16:4)+HCOO   | MGDG  | 1.19 | 0.013           | 0.69 | 10.17    |
| MGMG(16:1)+HCOO        | MGMG  | 3.44 | 0.014           | 0.60 | 2.82     |
| MGMG(16:2)+HCOO        | MGMG  | 2.70 | 0.039           | 0.72 | 2.36     |
| TG(18:4/16:0/18:3)+NH4 | TG    | 1.97 | 0.041           | 0.57 | 18.78    |

### Figure S1. Gene annotation Venn diagram in transcriptome

Venn diagram was used to reflect the commonality and specificity of different data sets. Different databases were represented in different colors, and the numbers represented the quantity of genes expressed specifically or in common. The overlap region represented the number of shared genes expressed in different databases, while the non-overlap region represented the number of unique genes expressed in different databases.

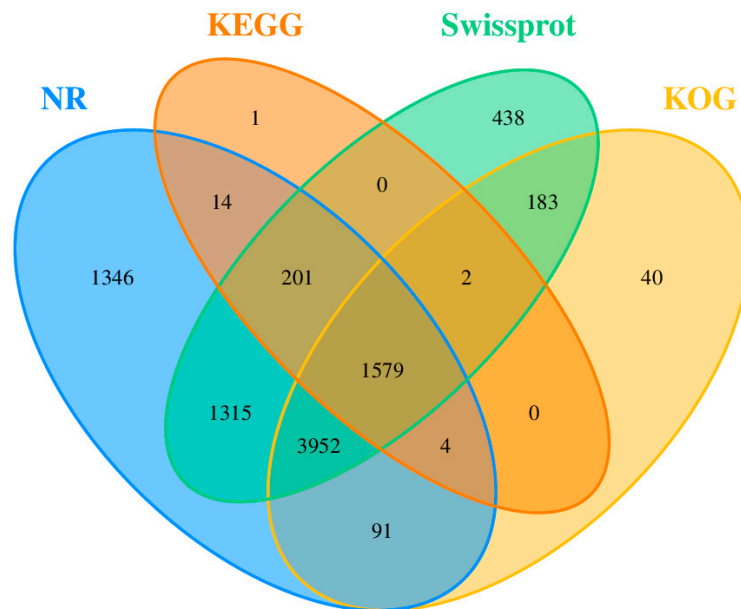

**Figure S2. Statistical table of the number of unique peptide segments in the proteome**

The unique peptide fragment is the protein's characteristic sequence. The horizontal axis represents the number of unique peptides, and the vertical axis represents the count of proteins used for unique peptides.

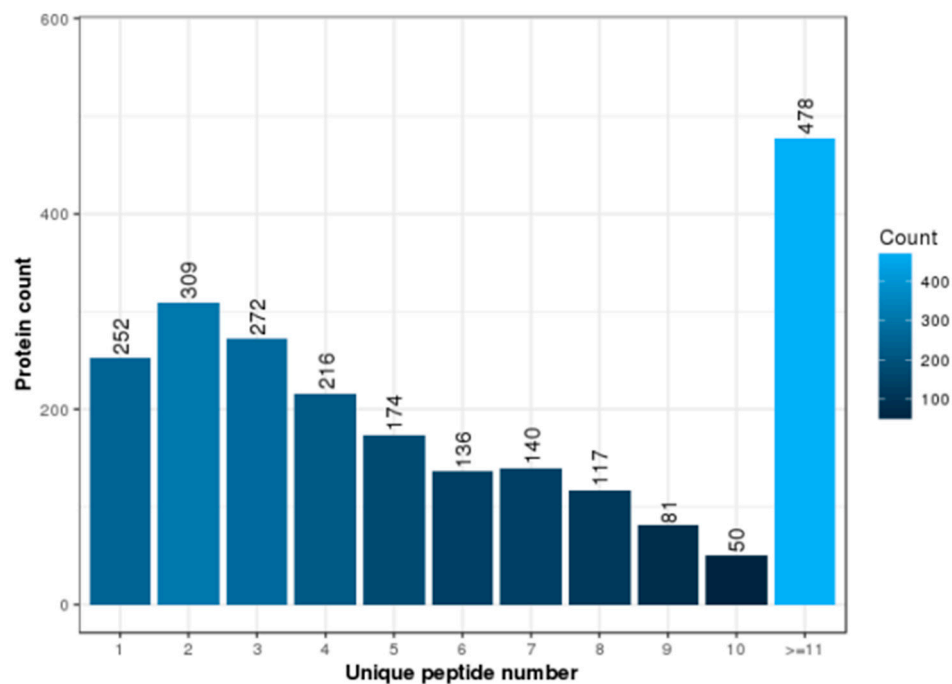



**Figure S3. Statistics of proteome data**

The horizontal axis represents the size of the protein, and the vertical axis represents the number of proteins of that size.

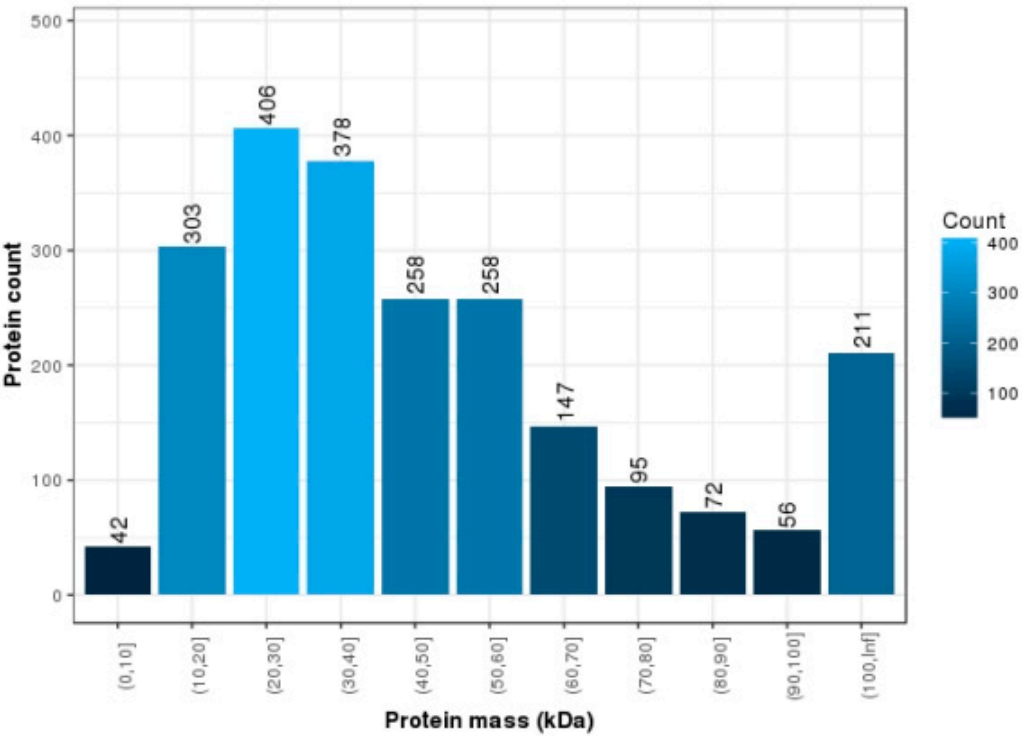

### Figure S4. Statistical of lipid subclasses and number

Note: Cer: ceramides; CerG1: ceramidesglycerol 1; Co: colipase; DG: diacylglycerol; DGDG: di-galactosyl diacyl glycerol; DGMG: diacylglycerol monoacylglycerol; FA: fatty acids; LPG: lysophosphatidyl glycerol; MG: monoacylglycerol; MGDG: mono-galactosyl diacyl glycerol; MGMG: monogalactosyl monoacylglycerol; PA: phosphatidic acids ; PE: phosphatidylethanolamines; PG: phosphatidylglycerol; PI: phosphatidylinositols; PIP: phosphoinositides; PS: phosphatidylserines; So: sphingosine; SQDG: sulfoquinovosyl diacylglycerol; SQMG: sulfoquinovosyl monoglycerides; TG: triglyceride

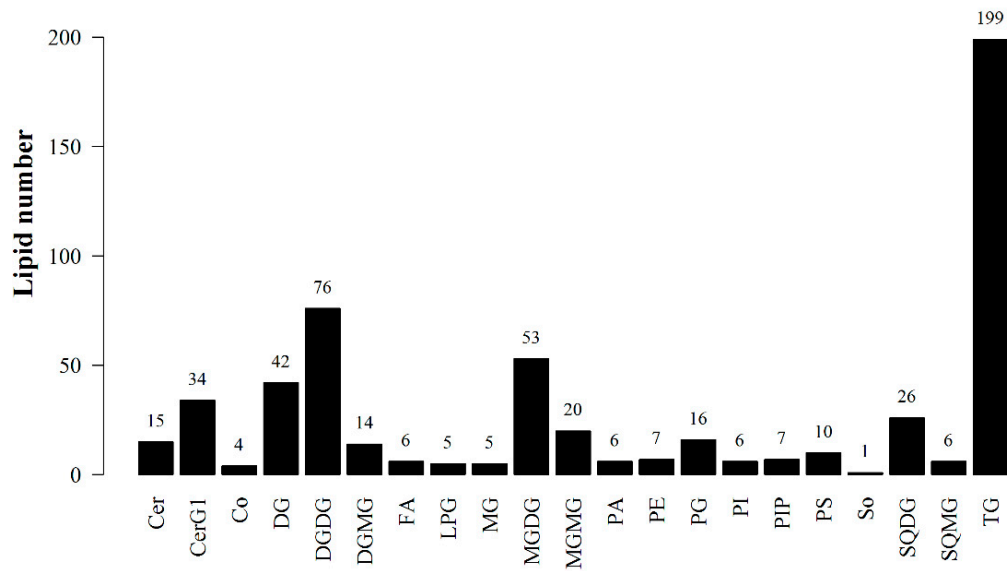

Supplement: s1 [file s1]
